# Supplementary material for: Higher Frequency of NK and CD4+ T-Cells in Mucosa and Potent Cytotoxic Response in HIV Controllers
Source: PubMed Central journal article supplement (PMC4546229; doi:10.1371/journal.pone.0136292), 2015-08-20

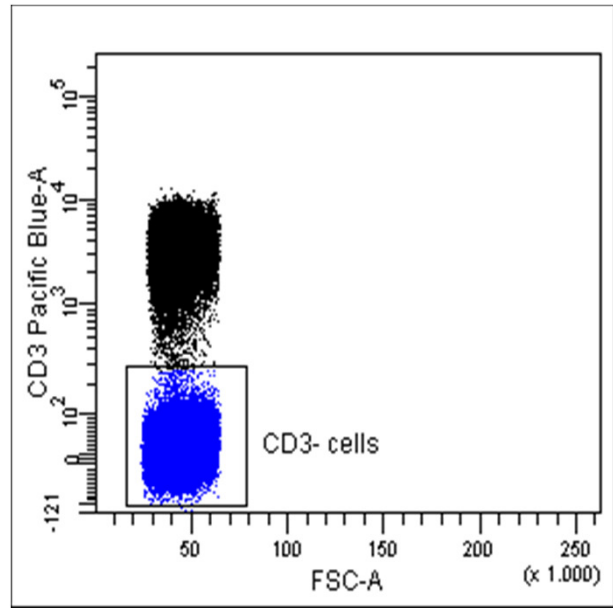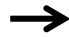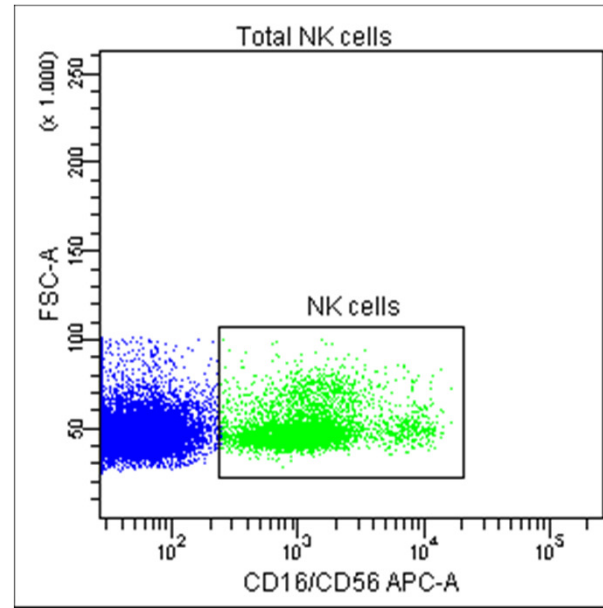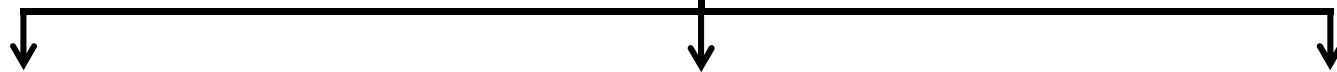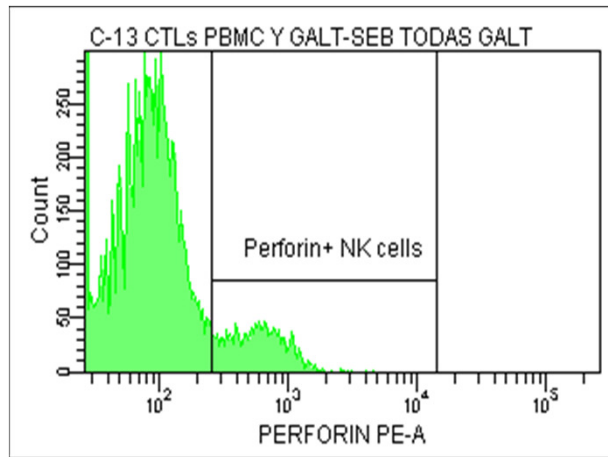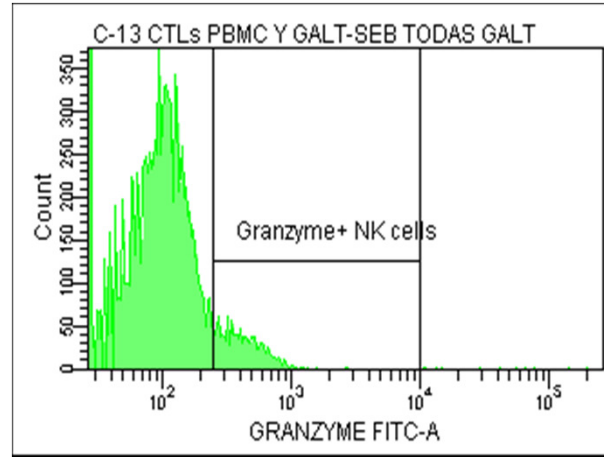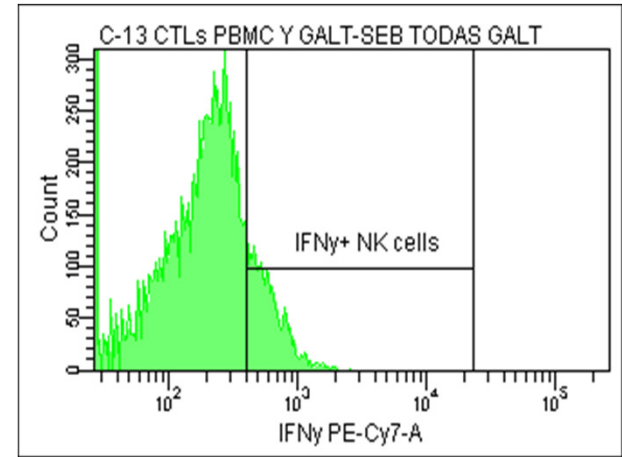

Supplement: pone.0136292.s002.pdf [file pone.0136292.s002.pdf]
